# Supplementary material for: Non-conjugated fluorescent molecular cages of salicylaldehyde-based tri-Schiff bases: AIE, enantiomers, mechanochromism, anion hosts/probes, and cell imaging properties
Source: Royal Society of Chemistry journal article supplement (doi:10.1039/c7qm00097a), 2017-01-01
Supplement: c7qm00097a1.pdf [file c7qm00097a1.pdf]

## Supporting Information

### **Non-conjugated fluorescent molecular cages of salicylaldehyde-based tri-Schiff bases: AIE, enantiomers, mechanochromism, anion hosts/probes, and cell imaging properties**

Xiaohong Zhang,<sup>‡a</sup> Jun Shi,<sup>‡b</sup> Guangyu Shen,<sup>a</sup> Fei Gou,<sup>a</sup> Jinghui Cheng,<sup>a</sup> Xiangge Zhou,<sup>a</sup> and Haifeng Xiang<sup>\*a</sup>

<sup>a</sup> College of Chemistry, Sichuan University, Chengdu, 610041, China. Fax: (+86) 28-8541-2291. E-mail: xianghaifeng@scu.edu.cn.

<sup>b</sup> Department of Cardiovascular Surgery, West China Hospital, Sichuan University, 37 Guoxue Xiang St., Chengdu, Sichuan, China

<sup>‡</sup> These authors contributed equally to this work.

## EXPERIMENTAL SECTION

**Materials and Instrumentation.** All reagents were purchased from commercial suppliers and used without further purification. All the Salen ligands were prepared according to previous reports.<sup>[14]</sup> <sup>1</sup>HNMR (400MHz) spectra were recorded in CDCl<sub>3</sub> or DMSO-d<sub>6</sub>. Chemical shifts are reported in ppm using tetramethylsilane as internal standard. UV/vis absorption spectra were recorded using a U5100 (Hitachi) spectrophotometer with quartz cuvettes of 1 cm pathlength. Fluorescence spectra were obtained using F-7000 Fluorescence spectrophotometer (Hitachi) at room temperature. The slit width was 2.5 nm for both excitation and emission. The photon multiplier voltage was 400 V. Samples in solution and powder were contained in 1 cm path length quartz cuvettes (3.5 mL volume) and quartz tube, respectively. The single-crystals of **TSB**, **3-F**, **3,5-Cl**, **3-OMe**, and **3-*t*-Bu**, were obtained by a slow diffusion/evaporation of CH<sub>2</sub>Cl<sub>2</sub>/hexane solution at room temperature during about two weeks.

**Measurement of Fluorescence Quantum Yield ( $\Phi$ ).** The quantum yield of a solution sample was measured by the optical dilute method of Demas and Crosby<sup>[18]</sup> with a standard of quinine sulfate ( $\Phi_r = 0.55$ , quinine in 0.05 mol dm<sup>-3</sup> sulfuric acid) calculated by:  $\Phi_s = \Phi_r(B_r/B_s)(n_s/n_r)^2(D_s/D_r)$ , where the subscripts s and r refer to the sample and reference standard solution respectively;  $n$  is the refractive index of the solvents;  $D$  is the integrated intensity. The excitation intensity  $B$  is calculated by:  $B = 1 - 10^{-A L}$ , where  $A$  is the absorbance at the excitation wavelength and  $L$  is the optical path length ( $L = 1$  cm in all cases). The refractive indices of the solvents at room temperature are taken from standard source. Errors for  $\Phi$  values ( $\pm 10\%$ ) are estimated. The quantum yield of a solid sample was measured by an integrating sphere.

**Computational Details.** Calculations were carried out using the Gaussian 09 software package (B3LYP 6-31G(d,p)). The geometry optimization and absorption transition and spectrum were carried out by DFT and TD-DFT, respectively. The theoretical modelling was performed in the isolated molecule approximation ignoring the effect of the aggregation state or solvent. For the atoms of **TSB**, the standard split-valence basis sets B3LYP 6-31G(d,p) augmented with polarization d-functions for the non-hydrogen atoms and p-functions for the hydrogen atoms were used. Full geometry optimization corresponding to the minima on the potential energy surface (PES) was conducted until a gradient of  $10^{-5}$  at.u. The spin multiplicities and charges of the **TSB** were set equal to 1 and 0, respectively. The spin

multiplicities and charges of the **TSB** (in form of  $O^-$ ) were set equal to 1 and  $-3$ , respectively. The other parameters were set to default values.

**Cell Culture Methods and Imaging.** The imaging of HeLa cells was finished by Fluorescence Vertical Microscope LEICA DM2500. HeLa cells were cultured in dulbecco's modified eagle medium (DMEM) supplemented with 10 % fetal bovine serum, penicillin ( $100 \text{ units mL}^{-1}$ ), streptomycin ( $100 \text{ mg mL}^{-1}$ ) and 5 %  $CO_2$  at  $37^\circ C$ . After removing the incubating media and rinse with PBS for three times, the cells were incubated with the dye ( $1.0 \times 10^{-5} \text{ mol dm}^{-3}$ ) in PBS for 2 h at room temperature. Then, the cells were washed three times with PBS and incubated with aqueous alkali for 20 min. At last, the cells were imaged with confocal microscope.

**Measurement of Anion hosts/probes:** Anion titration experiment was started with the dye (6 mL) of known concentration ( $1.0 \times 10^{-5} \text{ mol dm}^{-3}$  in MeCN or DMSO). For the titration, various sodium or potassium salts ( $1.0\text{--}0.10 \text{ mol dm}^{-3}$  in water) were added by a microsyringe. All types of absorption and fluorescence measurement were monitored at about 1 hours after the addition of the anion to the dye solution at room temperature.

**Synthesis of Organic Dyes:** **TSBs** were prepared by a similar method according to previous reports.<sup>[14]</sup> The mixture of salicylaldehyde or salicylaldehyde derivatives (3.1 mmol) and the corresponding triamine (1.0 mmol) in 20 mL ethanol solution was refluxed at  $78^\circ C$  for 5 h. After the reaction was complete, the mixture was cooled to  $0^\circ C$  and then the product in crystal or powder was collected by filtration.

**TSB** (84% yield):  $^1H$  NMR (400 MHz,  $CDCl_3$ )  $\delta$  13.78 (s, 3H), 7.81 (s, 3H), 7.24 – 7.28 (ddd,  $J = 8.7, 7.4, 1.7 \text{ Hz}$ , 3H), 6.93 (d,  $J = 8.2 \text{ Hz}$ , 3H), 6.59 (td,  $J = 7.5, 1.1 \text{ Hz}$ , 3H), 6.08 (dd,  $J = 7.7, 1.7 \text{ Hz}$ , 3H), 3.57 – 3.49 (t, 6H), 2.86 – 2.79 (t, 6H).  $^{13}C$  NMR (101 MHz,  $CDCl_3$ )  $\delta$  166.17, 161.13, 131.91, 131.79, 118.62, 118.55, 116.77, 58.01, 55.93. HRMS (ESI): Calculated for  $C_{27}H_{30}N_4O_3[[M+Na]^+]$  481.2215, found 481.2187. Anal. Calcd. (Found): C, 70.72 (70.67); H, 6.59 (6.60); N, 12.22 (12.20).

**3-F-TSB** (80% yield):  $^1H$  NMR (400 MHz, DMSO)  $\delta$  14.20 (s, 3H), 8.40 (s, 3H), 7.17 (ddd,  $J = 11.9, 7.9, 1.5 \text{ Hz}$ , 3H), 6.88 (d,  $J = 7.8 \text{ Hz}$ , 3H), 6.52 (td,  $J = 7.9, 4.5 \text{ Hz}$ , 3H), 3.66 (t,  $J = 5.8 \text{ Hz}$ , 6H), 2.88 (t,  $J = 6.0 \text{ Hz}$ , 6H).  $^{13}C$  NMR (101 MHz, DMSO)  $\delta$  166.66, 153.42, 151.00, 127.83, 119.42, 118.90, 115.60, 54.69, 54.44. HRMS (ESI): Calculated for  $C_{27}H_{27}N_4O_3F_3[[M+Na]^+]$  535.1932, found 535.1898. Anal. Calcd. (Found): C, 63.27 (63.21); H, 5.31 (5.29); N, 10.93 (10.96).

**3-Cl-TSB** (72% yield):  $^1H$  NMR (400 MHz,  $CDCl_3$ )  $\delta$  14.85 (s, 3H), 7.92 (s, 3H), 7.31 (dd,  $J = 7.8, 1.6 \text{ Hz}$ , 3H), 6.46 (t,  $J = 7.8 \text{ Hz}$ , 3H), 6.31 (dd,  $J = 7.8, 1.6 \text{ Hz}$ , 3H), 3.65 – 3.55 (t,

6H), 2.91 – 2.80 (t, 6H).  $^{13}\text{C}$  NMR (101 MHz,  $\text{CDCl}_3$ )  $\delta$  165.97, 159.05, 132.57, 130.29, 121.89, 118.61, 117.82, 56.13, 55.34. HRMS (ESI): Calculated for  $\text{C}_{27}\text{H}_{27}\text{N}_4\text{O}_3\text{Cl}_3$   $[[\text{M}+\text{Na}]^+]$  583.1149, found 583.1134. Anal. Calcd. (Found): C, 57.71 (57.67); H, 4.84 (4.85); N, 9.97 (9.96).

**3-Me-TSB** (74% yield):  $^1\text{H}$  NMR (400 MHz, DMSO)  $\delta$  13.89 (s, 3H), 8.25 (s, 3H), 7.18 (d,  $J = 7.2$  Hz, 3H), 6.83 – 6.76 (m, 3H), 6.67 (t,  $J = 7.5$  Hz, 3H), 3.61 (t,  $J = 5.8$  Hz, 6H), 2.86 (t,  $J = 6.0$  Hz, 6H), 2.14 (s, 9H).  $^{13}\text{C}$  NMR (101 MHz, DMSO)  $\delta$  166.89, 159.75, 133.36, 129.65, 125.36, 118.18, 118.06, 57.24, 55.40, 15.69. HRMS (ESI): Calculated for  $\text{C}_{30}\text{H}_{36}\text{N}_4\text{O}_3$   $[[\text{M}+\text{Na}]^+]$  523.2684, found 523.2650. Anal. Calcd. (Found): C, 71.97 (71.99); H, 7.25 (7.24); N, 9.59 (9.57).

**3-*t*-Bu-TSB** (70% yield):  $^1\text{H}$  NMR (400 MHz,  $\text{CDCl}_3$ )  $\delta$  14.47 (s, 3H), 7.73 (s, 3H), 7.28 (dd,  $J = 7.8$ , 1.6 Hz, 3H), 6.53 (t,  $J = 7.7$  Hz, 3H), 5.78 (dd,  $J = 7.6$ , 1.5 Hz, 3H), 3.57 – 3.46 (t, 6H), 2.90 – 2.81 (t, 6H), 1.41 (s, 27H).  $^{13}\text{C}$  NMR (101 MHz,  $\text{CDCl}_3$ )  $\delta$  166.72, 160.40, 137.10, 130.21, 128.95, 118.56, 117.78, 58.10, 56.33, 34.79, 29.33. HRMS (ESI): Calculated for  $\text{C}_{39}\text{H}_{54}\text{N}_4\text{O}_3$   $[[\text{M}+\text{Na}]^+]$  649.4196, found 649.4203. Anal. Calcd. (Found): C, 74.72 (74.77); H, 8.68 (8.66); N, 8.94 (8.92).

**3-OMe-TSB** (82% yield):  $^1\text{H}$  NMR (400 MHz,  $\text{CDCl}_3$ )  $\delta$  14.29 (s, 3H), 7.81 (s, 3H), 6.86 (dd,  $J = 8.0$ , 1.3 Hz, 3H), 6.52 (t,  $J = 7.9$  Hz, 3H), 5.84 (dd,  $J = 7.9$ , 1.3 Hz, 3H), 3.89 (s, 9H), 3.57 – 3.51 (t, 6H), 2.88 – 2.80 (t, 6H).  $^{13}\text{C}$  NMR (101 MHz,  $\text{CDCl}_3$ )  $\delta$  166.30, 152.65, 148.47, 123.49, 118.17, 117.34, 113.63, 57.24, 56.08, 55.88. HRMS (ESI): Calculated for  $\text{C}_{30}\text{H}_{36}\text{N}_4\text{O}_6$   $[[\text{M}+\text{Na}]^+]$  571.2532, found 571.2500. Anal. Calcd. (Found): C, 65.68 (65.64); H, 6.61 (6.62); N, 10.21 (10.23).

**3-OH-TSB** (79% yield):  $^1\text{H}$  NMR (400 MHz, DMSO)  $\delta$  13.71 (s, 3H), 8.78 (s, 3H), 8.27 (s,  $J = 30.7$  Hz, 3H), 6.84 – 6.73 (m, 3H), 6.60 – 6.40 (m, 6H), 3.61 (t,  $J = 5.7$  Hz, 6H), 2.87 (t,  $J = 5.7$  Hz, 6H).  $^{13}\text{C}$  NMR (101 MHz, DMSO)  $\delta$  166.94, 153.62, 146.67, 122.36, 117.83, 117.55, 117.24, 55.81, 55.29. HRMS (ESI): Calculated for  $\text{C}_{27}\text{H}_{30}\text{N}_4\text{O}_6$   $[[\text{M}+\text{Na}]^+]$  529.2156, found 529.2162. Anal. Calcd. (Found): C, 64.02 (64.07); H, 5.97 (5.98); N, 11.06 (11.04).

**3-NO<sub>2</sub>-TSB** (82% yield):  $^1\text{H}$  NMR (400 MHz, DMSO)  $\delta$  14.25 (s, 3H), 8.45 (s, 3H), 7.91 (dd,  $J = 7.9$ , 1.9 Hz, 3H), 7.31 (dd,  $J = 7.8$ , 1.9 Hz, 3H), 6.22 (t,  $J = 7.8$  Hz, 3H), 3.75 (t, 6H), 2.93 (t,  $J = 5.5$  Hz, 6H). HRMS (ESI): Calculated for  $\text{C}_{27}\text{H}_{27}\text{N}_7\text{O}_9$   $[[\text{M}+\text{Na}]^+]$  616.1870, found 616.1881. Anal. Calcd. (Found): C, 54.64 (54.68); H, 4.59 (4.58); N, 16.52 (16.54).

**4-NEt<sub>2</sub>-TSB** (70% yield):  $^1\text{H}$  NMR (400 MHz,  $\text{CDCl}_3$ )  $\delta$  14.08 (s, 3H), 7.51 (s, 3H), 6.18 – 5.81 (m, 9H), 3.43 (t, 6H), 3.36 (q,  $J = 6.9$  Hz, 12H), 2.76 (t,  $J = 3.9$  Hz, 6H), 1.20 (t,  $J = 7.0$  Hz, 18H).  $^{13}\text{C}$  NMR (101 MHz,  $\text{CDCl}_3$ )  $\delta$  168.92, 164.15, 151.88, 134.24, 108.32, 102.67, 98.65, 56.23, 54.57, 44.50, 12.87. HRMS (ESI): Calculated for  $\text{C}_{39}\text{H}_{57}\text{N}_7\text{O}_3$   $[[\text{M}+\text{Na}]^+]$

694.4523, found 694.4518 Anal. Calcd. (Found): C, 69.71 (69.74); H, 8.55 (8.56); N, 14.59 (14.56).

**4-OH-TSB** (82% yield):  $^1\text{H}$  NMR (400 MHz, DMSO)  $\delta$  13.86 (s, 3H), 9.91 (s, 3H), 8.05 (s, 3H), 6.76 (d,  $J$  = 8.3 Hz, 3H), 6.13 (dt,  $J$  = 3.5, 2.2 Hz, 6H), 3.48 (t,  $J$  = 5.8 Hz, 6H), 2.77 (t,  $J$  = 5.9 Hz, 6H).  $^{13}\text{C}$  NMR (101 MHz, DMSO)  $\delta$  166.38, 165.56, 162.43, 133.92, 111.48, 107.02, 103.22, 55.65, 55.56. HRMS (ESI): Calculated for  $\text{C}_{27}\text{H}_{30}\text{N}_4\text{O}_6$   $[[\text{M}+\text{Na}]^+]$  529.2156, found 529.2159. Anal. Calcd. (Found): C, 64.02 (64.06); H, 5.97 (5.96); N, 11.06 (11.03).

**5-OMe-TSB** (75% yield):  $^1\text{H}$  NMR (400 MHz,  $\text{CDCl}_3$ )  $\delta$  13.35 (s, 3H), 7.90 (s, 3H), 6.86 (dd,  $J$  = 2.5, 1.6 Hz, 6H), 6.02 (d,  $J$  = 2.2 Hz, 3H), 3.62 (s, 9H), 3.58 – 3.51 (t, 6H), 2.91 – 2.83 (t, 6H).  $^{13}\text{C}$  NMR (101 MHz,  $\text{CDCl}_3$ )  $\delta$  165.77, 155.15, 151.87, 119.02, 118.38, 117.40, 114.86, 58.03, 56.26, 55.67. HRMS (ESI): Calculated for  $\text{C}_{30}\text{H}_{36}\text{N}_4\text{O}_6$   $[[\text{M}+\text{Na}]^+]$  571.2532, found 571.2519. Anal. Calcd. (Found): C, 65.68 (65.65); H, 6.61 (6.59); N, 10.21 (10.22).

**5-NO<sub>2</sub>-TSB** (87% yield):  $^1\text{H}$  NMR (400 MHz, DMSO)  $\delta$  14.10 (s, 3H), 8.56 (s, 3H), 8.10 (d,  $J$  = 3.1 Hz, 3H), 7.84 (dd,  $J$  = 9.7, 3.1 Hz, 3H), 6.46 (d,  $J$  = 9.7 Hz, 3H), 3.73 (t, 6H), 2.92 (t,  $J$  = 5.5 Hz, 6H).  $^{13}\text{C}$  NMR (101 MHz, DMSO)  $\delta$  177.96, 167.77, 134.08, 132.91, 129.28, 122.92, 113.71, 53.43, 50.58. HRMS (ESI): Calculated for  $\text{C}_{27}\text{H}_{27}\text{N}_7\text{O}_9$   $[[\text{M}+\text{Na}]^+]$  616.1870, found 616.1877 Anal. Calcd. (Found): C, 54.64 (54.67); H, 4.59 (4.60); N, 16.52 (16.51).

**3,5-Cl-TSB** (90% yield):  $^1\text{H}$  NMR (400 MHz, DMSO)  $\delta$  14.49 (s, 3H), 8.30 (s, 3H), 7.43 (d,  $J$  = 2.7 Hz, 3H), 6.98 (d,  $J$  = 2.7 Hz, 3H), 3.66 (t,  $J$  = 4.9 Hz, 6H), 2.92 – 2.84 (t, 6H).  $^{13}\text{C}$  NMR (101 MHz, DMSO)  $\delta$  166.03, 164.34, 133.33, 130.48, 125.09, 117.12, 116.72, 54.14, 52.30. HRMS (ESI): Calculated for  $\text{C}_{27}\text{H}_{24}\text{N}_4\text{O}_3\text{Cl}_6$   $[[\text{M}+\text{Na}]^+]$  684.9877, found 684.9886. Anal. Calcd. (Found): C, 48.75 (48.77); H, 3.64 (3.63); N, 8.42 (8.43).

**3,5-NO<sub>2</sub>-TSB** (78% yield):  $^1\text{H}$  NMR (400 MHz, DMSO)  $\delta$  13.29 (s, 3H), 8.78 (s, 3H), 8.54 (d,  $J$  = 3.1 Hz, 3H), 8.42 (d,  $J$  = 3.1 Hz, 3H), 3.85 (t, 6H), 3.03 (t, 6H).  $^{13}\text{C}$  NMR (101 MHz, DMSO)  $\delta$  175.93, 170.02, 140.52, 130.04, 129.98, 127.38, 117.81, 55.40, 51.87. HRMS (ESI): Calculated for  $\text{C}_{27}\text{H}_{24}\text{N}_{10}\text{O}_{15}$   $[[\text{M}+\text{Na}]^+]$  751.1423, found 751.1427. Anal. Calcd. (Found): C, 44.51 (44.54); H, 3.32 (3.31); N, 19.23 (19.27).

**Naph-TSB** (71% yield):  $^1\text{H}$  NMR (400 MHz, DMSO)  $\delta$  13.96 (dd,  $J$  = 10.5, 5.2 Hz, 3H), 9.08 (d,  $J$  = 10.7 Hz, 3H), 8.02 (d,  $J$  = 8.3 Hz, 3H), 7.73 – 7.54 (m, 6H), 7.36 (ddd,  $J$  = 8.4, 7.1, 1.4 Hz, 3H), 7.20 – 7.10 (m, 3H), 6.67 (d,  $J$  = 9.4 Hz, 3H), 3.75 (t,  $J$  = 11.8, 6.1 Hz, 6H), 2.97 (t,  $J$  = 6.5 Hz, 6H).  $^{13}\text{C}$  NMR (101 MHz, DMSO)  $\delta$  178.25, 159.57, 137.53, 134.84, 129.27, 128.23, 126.21, 125.54, 122.47, 118.89, 106.15, 55.18, 49.89. HRMS (ESI): Calculated for  $\text{C}_{39}\text{H}_{36}\text{N}_4\text{O}_3$   $[[\text{M}+\text{Na}]^+]$  631.2787 found 631.2781. Anal. Calcd. (Found): C, 76.95 (76.86); H, 5.96 (5.95); N, 9.20 (9.22).

**Table. S1** Photophysical data of **TSBs**. Sample without emission data means that it is non-emissive. The amount of X<sup>-</sup> is 100 equivalent to **TSBs**.

| <b>TSBs</b>                            | <b>medium</b> | $\lambda_{\text{abs}}/\text{nm}$ ( $\epsilon/\text{dm}^3 \text{ mol}^{-1} \text{ cm}^{-1}$ ) | $\lambda_{\text{em}}/\text{nm}$ | <b>Stokes shift /nm</b> | $\Phi$  | $f/\%$ |
|----------------------------------------|---------------|----------------------------------------------------------------------------------------------|---------------------------------|-------------------------|---------|--------|
| <b>TSB</b>                             | MeCN          | 253(4.85×10 <sup>4</sup> ); 314(2.27×10 <sup>5</sup> )                                       | 426                             |                         | 0.0028  |        |
|                                        | Water         | 328; 382                                                                                     | 497                             | 115                     | 0.015   | 60     |
|                                        | Solid         |                                                                                              | 497                             |                         | 0.018   |        |
| <b>TSB+F<sup>-</sup></b>               | MeCN          | 314(4.83); 404(2.13×10 <sup>3</sup> )                                                        | 418                             |                         | 0.0029  |        |
|                                        | DMSO          | 316(1.73×10 <sup>4</sup> ); 399(8.87×10 <sup>3</sup> )                                       | 464                             |                         | 0.023   |        |
| <b>TSB+OH<sup>-</sup></b>              | MeCN          | 351(8.90×10 <sup>4</sup> )                                                                   | 432                             |                         | 0.036   |        |
|                                        | DMSO          | 262(3.18×10 <sup>4</sup> ); 370(2.83×10 <sup>4</sup> )                                       | 457                             |                         | 0.23    |        |
| <b>TSB+HCO<sub>3</sub><sup>-</sup></b> | MeCN          | 314(6.48×10 <sup>4</sup> ); 404(4.47×10 <sup>3</sup> )                                       | 420                             |                         | 0.0081  |        |
|                                        | DMSO          | 284(1.52×10 <sup>4</sup> ); 411(3.10×10 <sup>3</sup> )                                       | 433                             |                         | 0.29    |        |
| <b>3-F</b>                             | MeCN          | 311(1.02×10 <sup>4</sup> ); 409(4.77×10 <sup>3</sup> )                                       | 435                             |                         | 0.0037  |        |
|                                        | Water         | 382                                                                                          | 501                             | 119                     | 0.025   | 60     |
|                                        | Solid         |                                                                                              | 512                             |                         | 0.13    |        |
| <b>3-F+F<sup>-</sup></b>               | MeCN          | 312(9.70×10 <sup>4</sup> ); 409(5.27×10 <sup>3</sup> )                                       | 482                             |                         | 0.021   |        |
|                                        | DMSO          | 262(4.40×10 <sup>4</sup> ); 390(3.25×10 <sup>3</sup> )                                       | 449                             |                         | 0.37    |        |
| <b>3-F+OH<sup>-</sup></b>              | MeCN          | 345(2.70×10 <sup>4</sup> )                                                                   | 450                             |                         | 0.035   |        |
|                                        | DMSO          | 260(3.97×10 <sup>4</sup> ); 365(2.54×10 <sup>4</sup> )                                       | 450                             |                         | 0.42    |        |
| <b>3-Cl</b>                            | MeCN          | 319(5.41×10 <sup>3</sup> ); 416(3.92×10 <sup>3</sup> )                                       | 432                             |                         | 0.0065  |        |
|                                        | Water         | 392                                                                                          | 505                             | 113                     | 0.025   | 60     |
|                                        | Solid         |                                                                                              | 526                             |                         | 0.12    |        |
| <b>3,5-Cl</b>                          | MeCN          | 330(8.4×10 <sup>3</sup> ); 428(1.16×10 <sup>4</sup> )                                        | 494                             |                         | 0.018   |        |
|                                        | Water         | 403                                                                                          | 510                             | 107                     | 0.048   | 60     |
|                                        | Solid         |                                                                                              | 522                             |                         | 0.18    |        |
| <b>3,5-Cl+F<sup>-</sup></b>            | MeCN          | 331(8.00×10 <sup>3</sup> ); 426(1.33×10 <sup>4</sup> )                                       | 490                             |                         | 0.039   |        |
|                                        | DMSO          | 263(4.53×10 <sup>4</sup> ); 416(4.00×10 <sup>4</sup> )                                       | 462                             |                         | 0.41    |        |
| <b>3,5-Cl+OH<sup>-</sup></b>           | MeCN          | 366(2.98×10 <sup>4</sup> )                                                                   | 444                             |                         | 0.040   |        |
|                                        | DMSO          | 257(5.38×10 <sup>4</sup> ); 409(3.54×10 <sup>4</sup> )                                       | 463                             |                         | 0.44    |        |
| <b>3-CH<sub>3</sub></b>                | MeCN          | 254(3.55×10 <sup>4</sup> ); 320(1.30×10 <sup>4</sup> )                                       | 406                             |                         | 0.0039  |        |
|                                        | Water         | 335                                                                                          | 502                             | 167                     | 0.0043  | 60     |
|                                        | Solid         |                                                                                              | 514                             |                         | 0.022   |        |
| <b>3-OMe</b>                           | MeCN          | 328(8.43×10 <sup>3</sup> ); 420(1.56×10 <sup>3</sup> )                                       | 453                             |                         | 0.0052  |        |
|                                        | Water         | 393                                                                                          | 492                             | 99                      | 0.0024  | 50     |
|                                        | Solid         |                                                                                              | 537                             |                         | 0.010   |        |
| <b>3-tBu</b>                           | MeCN          | 256(3.57×10 <sup>4</sup> ); 320(1.67×10 <sup>4</sup> )                                       | 406                             |                         | 0.0036  |        |
|                                        | Solid         |                                                                                              | 516                             |                         | 0.0058  |        |
| <b>3-<i>t</i>-Bu+OH<sup>-</sup></b>    | MeCN          | 287(5.56×10 <sup>4</sup> ); 377(4.73×10 <sup>3</sup> )                                       | 434                             |                         | 0.0096  |        |
|                                        | DMSO          | 304(4.20×10 <sup>4</sup> )                                                                   | 468                             |                         | 0.47    |        |
| <b>3-NO<sub>2</sub></b>                | MeCN          | 357(3.48×10 <sup>4</sup> ); 409(3.63×10 <sup>4</sup> )                                       | 481                             |                         | 0.00088 |        |
|                                        | Water         | 359 ; 392                                                                                    |                                 |                         |         |        |
|                                        | Solid         |                                                                                              | 556                             |                         | 0.0048  |        |

|                           |       |                                                                                       |     |     |         |    |
|---------------------------|-------|---------------------------------------------------------------------------------------|-----|-----|---------|----|
| <b>3-OH</b>               | MeCN  | 295(1.34×10 <sup>4</sup> ); 425(4.77×10 <sup>3</sup> )                                | 460 |     | 0.0025  |    |
|                           | Water | 286 ; 322                                                                             | 427 | 105 | 0.0028  | 60 |
|                           | Solid |                                                                                       | 550 |     | 0.0067  |    |
| <b>4-OH</b>               | MeCN  | 305(1.12×10 <sup>4</sup> ); 380(5.37×10 <sup>3</sup> )                                | 406 |     | 0.00076 |    |
|                           | Water | 335                                                                                   | 430 | 95  | 0.00081 | 60 |
|                           | Solid |                                                                                       | 470 |     | 0.0051  |    |
| <b>4-NEt<sub>2</sub></b>  | MeCN  | 329(7.05×10 <sup>4</sup> )                                                            | 406 |     | 0.0062  |    |
|                           | Solid |                                                                                       | 487 |     | 0.011   |    |
| <b>5-OMe</b>              | MeCN  | 343(1.71×10 <sup>4</sup> )                                                            | 432 |     | 0.0068  |    |
|                           | Water | 405                                                                                   | 486 | 81  | 0.013   | 60 |
|                           | Solid |                                                                                       | 532 |     | 0.028   |    |
| <b>5-NO<sub>2</sub></b>   | MeCN  | 440(1.22×10 <sup>4</sup> )                                                            |     |     |         |    |
|                           | Water | 435                                                                                   |     |     |         |    |
|                           | Solid |                                                                                       | 548 |     | 0.044   |    |
| <b>3,5-NO<sub>2</sub></b> | MeCN  | 381(2.67×10 <sup>4</sup> )                                                            |     |     |         |    |
|                           | Water | 370                                                                                   |     |     |         |    |
|                           | Solid |                                                                                       | 558 |     | 0.0085  |    |
| <b>Naph</b>               | MeCN  | 305(3.74×10 <sup>4</sup> ); 401(3.03×10 <sup>4</sup> );<br>420(3.12×10 <sup>4</sup> ) | 450 |     | 0.00059 |    |
|                           | Water |                                                                                       | 454 | 43  | 0.0018  | 80 |
|                           | Solid |                                                                                       | 488 |     | 0.011   |    |

---

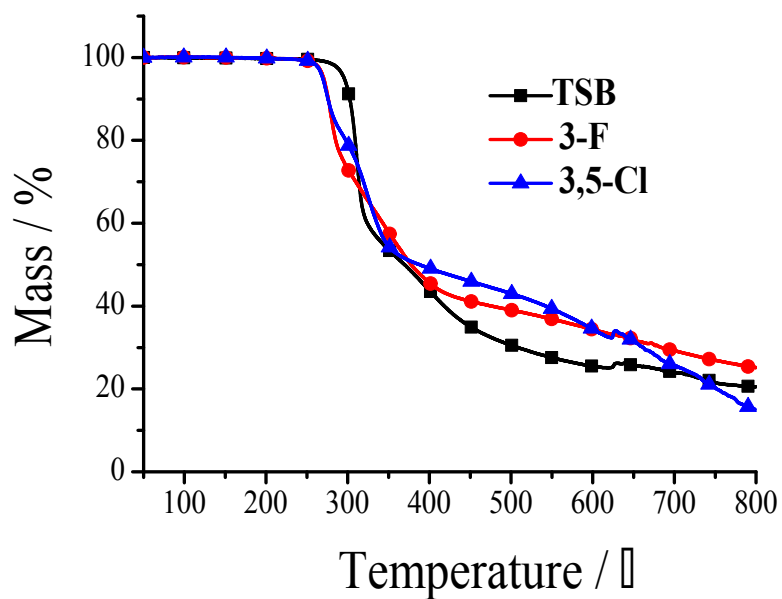

**Fig. S1** Thermogravimetric Analysis (TGA) experiments of TSB, 3-F, and 3,5-Cl (25°C–800°C, 10°C/min).

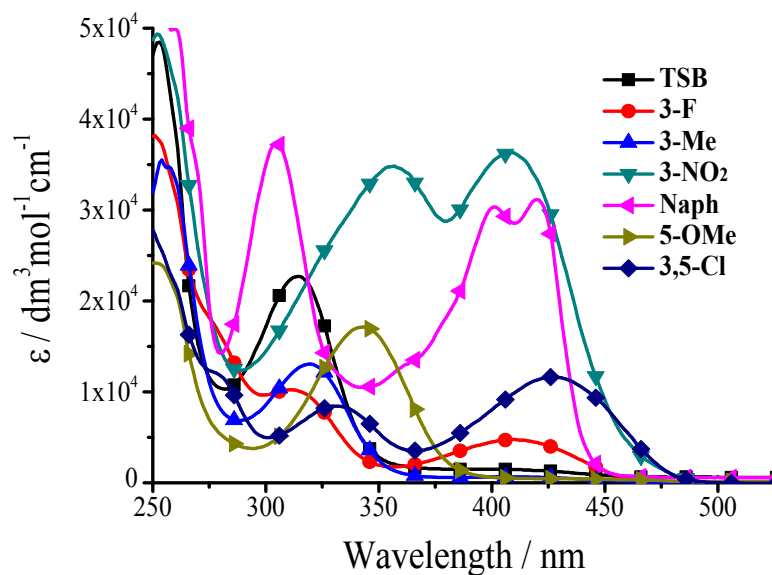

**Fig. S2** Absorption spectra of some selected TSBs in MeCN.



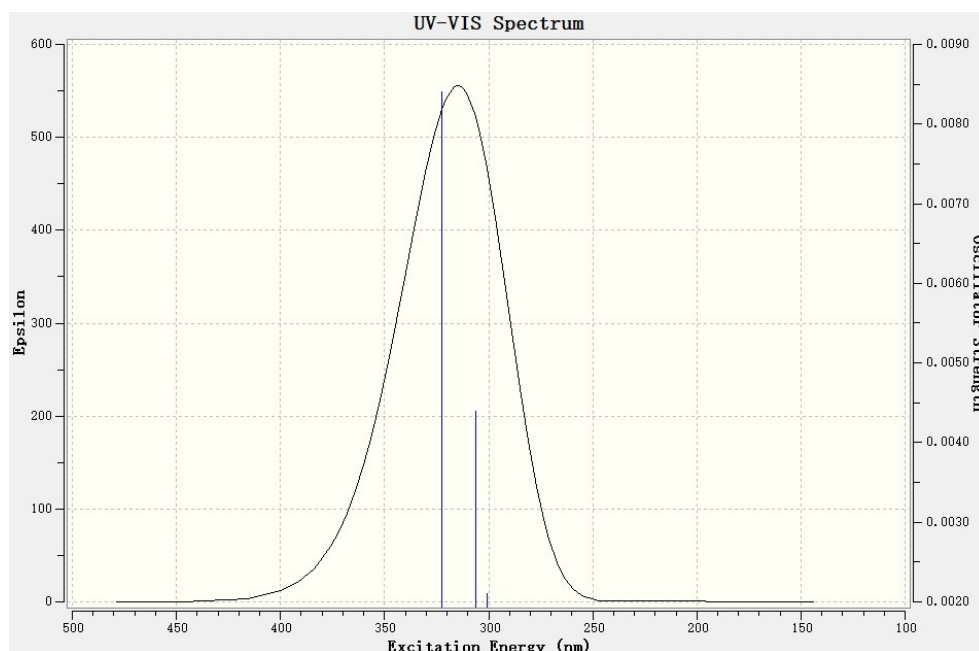

**Fig. S3** computational (gas-phase) absorption spectra of TSB.

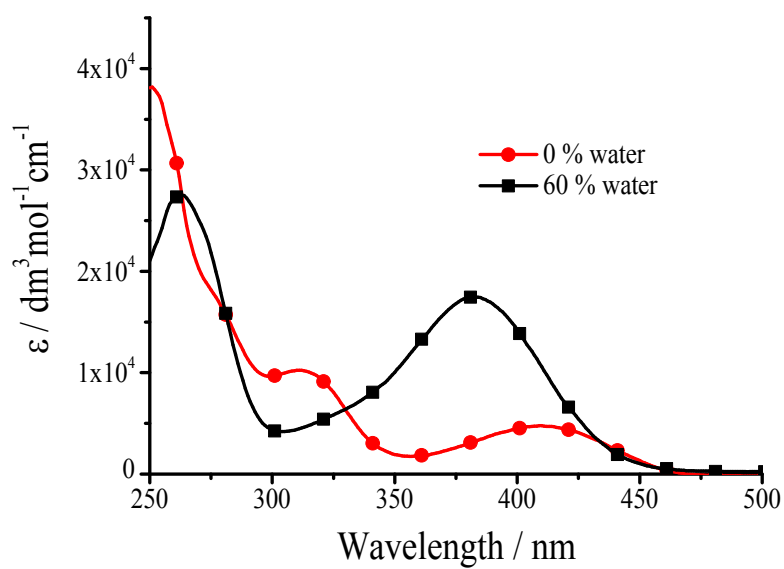

**Fig. S4** Absorption spectra of **3-F** in MeCN-H<sub>2</sub>O with different  $f$  values ( $3.0 \times 10^{-5} \text{ mol dm}^{-3}$ ).

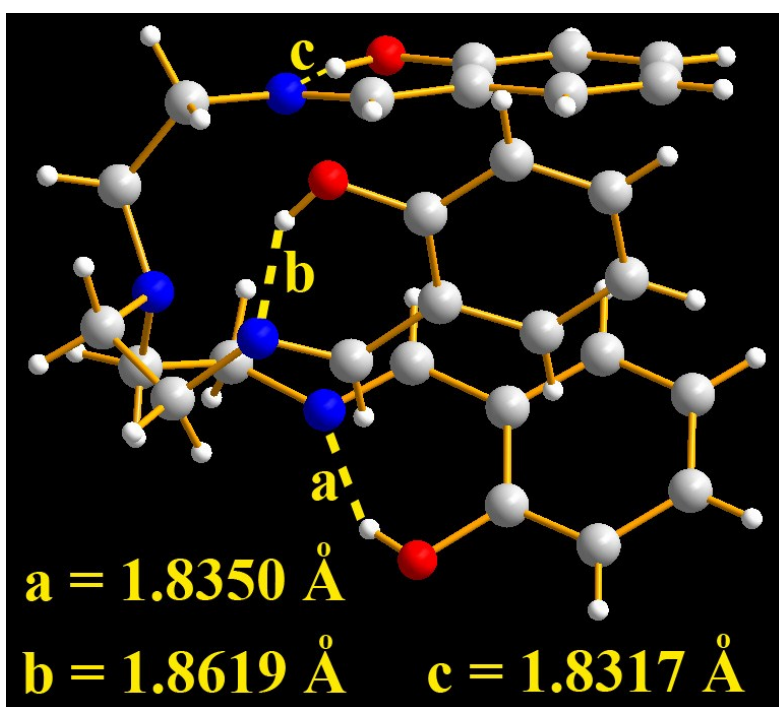

**Fig. S5** Intramolecular N...H hydrogen bonds in the X-ray single crystal structure of **TSB** molecule.

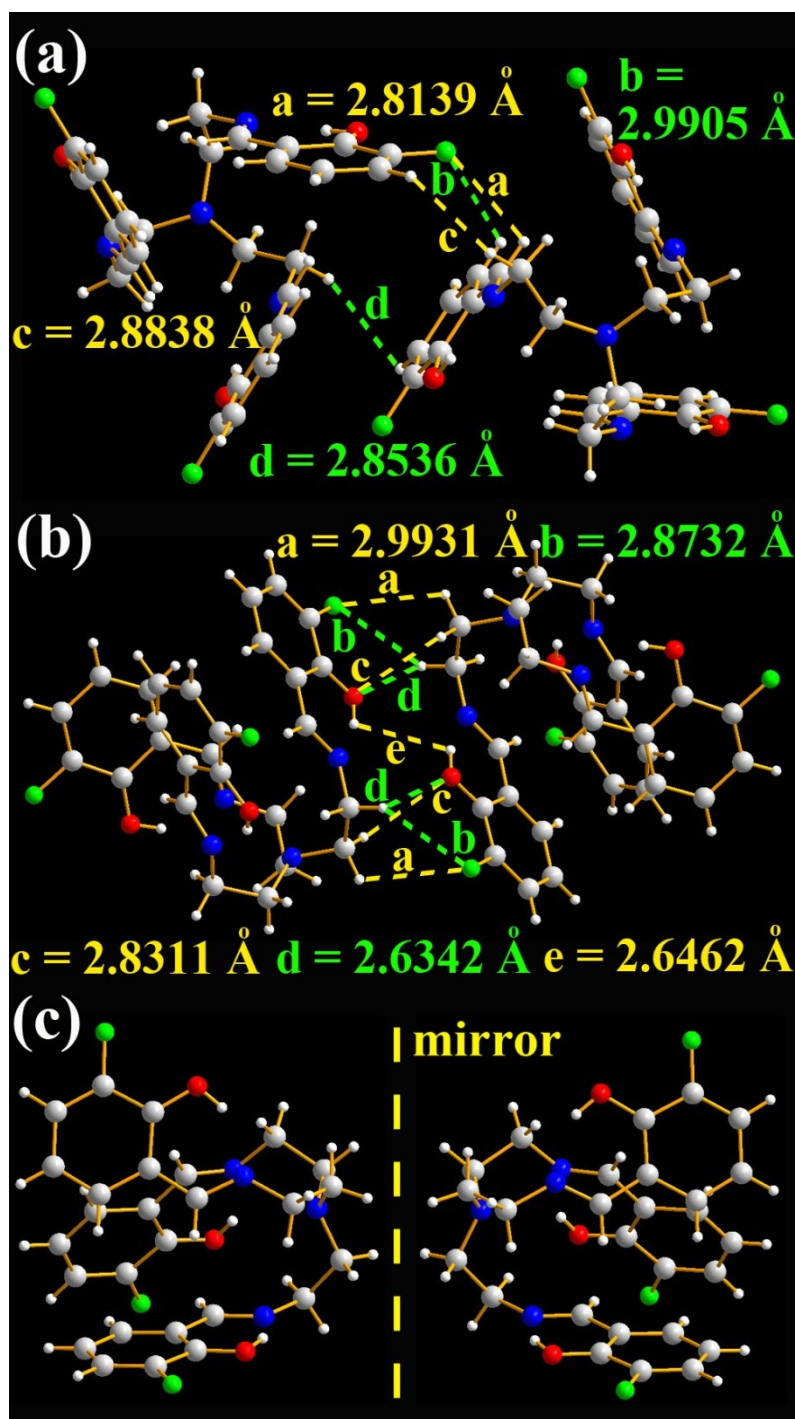

**Fig. S6** X-ray single crystal structures and packing of **3-F** molecules: (a) and (b), intermolecular interactions of the two closest molecules; (c) enantiomers.

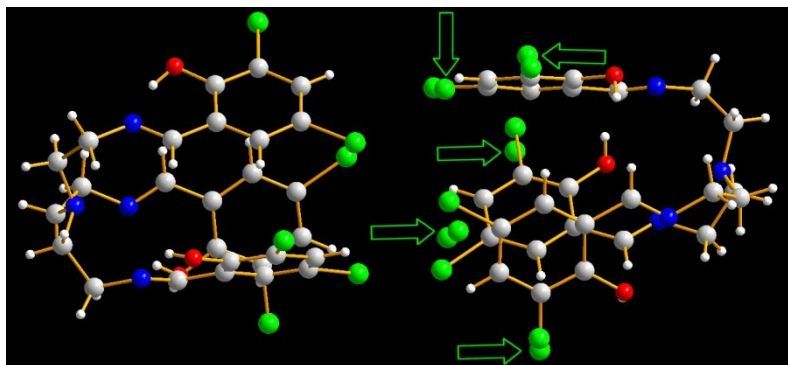

**Fig. S7** X-ray single crystal structure of two close **3,5-Cl** molecules. In one **3,5-Cl** molecule, the positions of Cl atoms are not fixed, due to the disorders of Cl atoms.

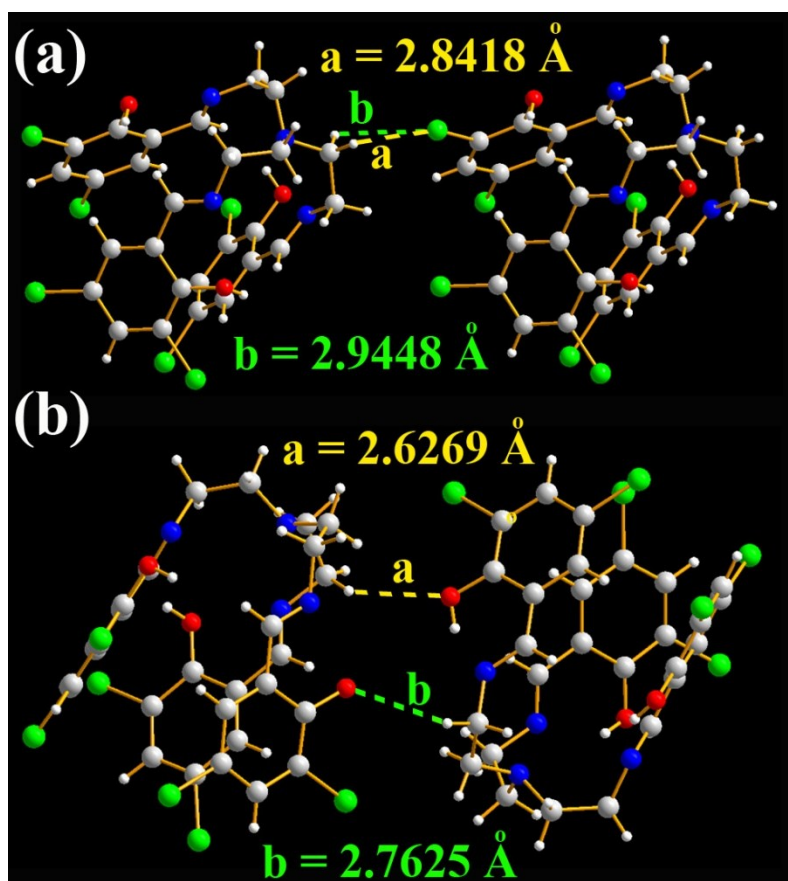

**Fig. S8** X-ray single crystal structures and packing of **3,5-Cl** molecules: (a) and (b), intermolecular interactions of the two closest molecules.

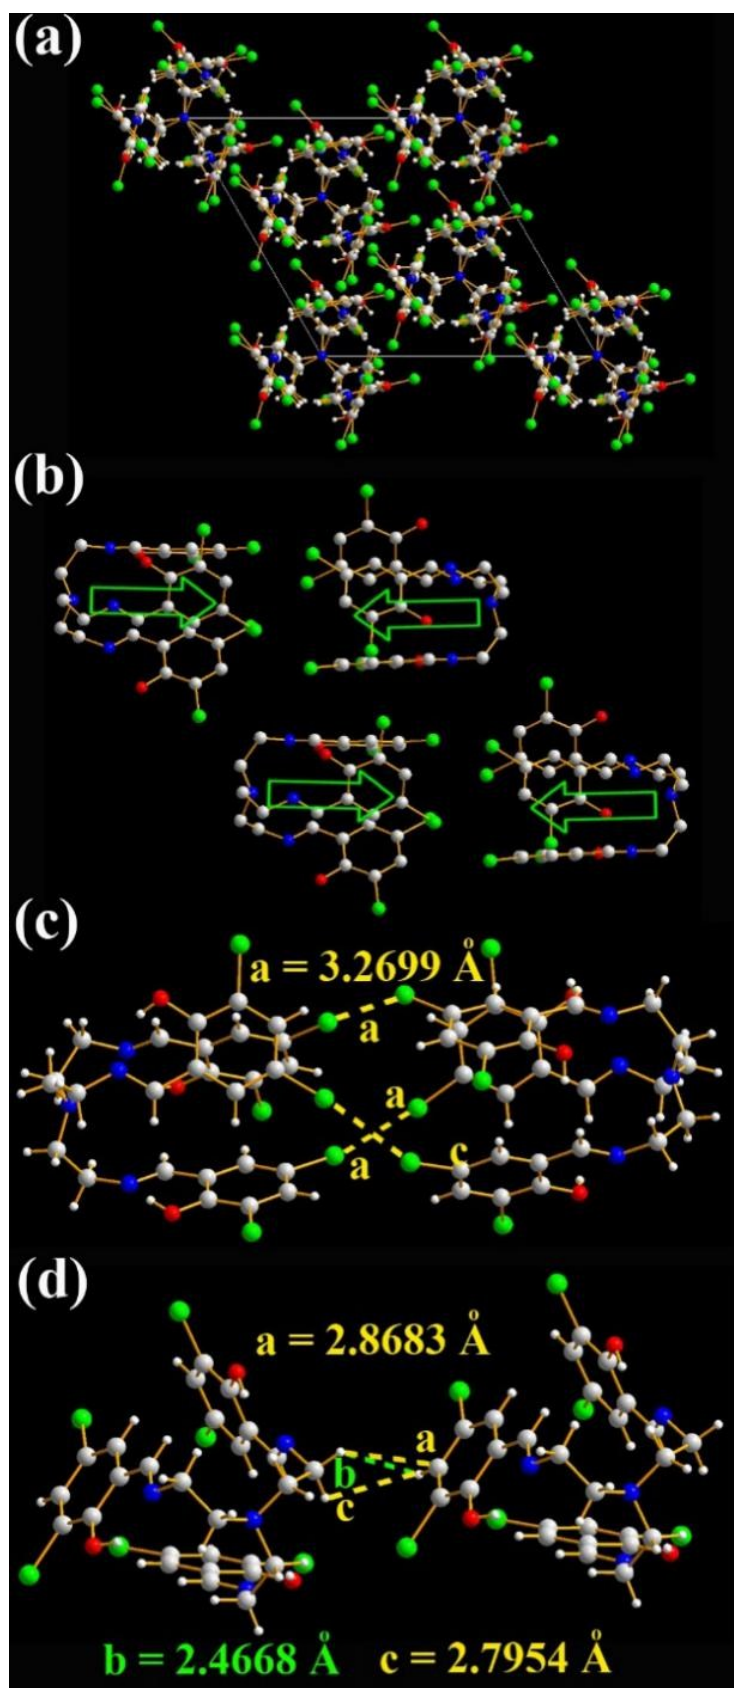

**Fig. S9** X-ray single crystal structures and packing of 3,5-Cl molecules: (a) packing in a unit cell (H atoms are omitted); (b) packing of some selected molecules (blue arrows indicate the opening direction of molecular cages); (c) and (d) intermolecular interactions of the two closest molecules.



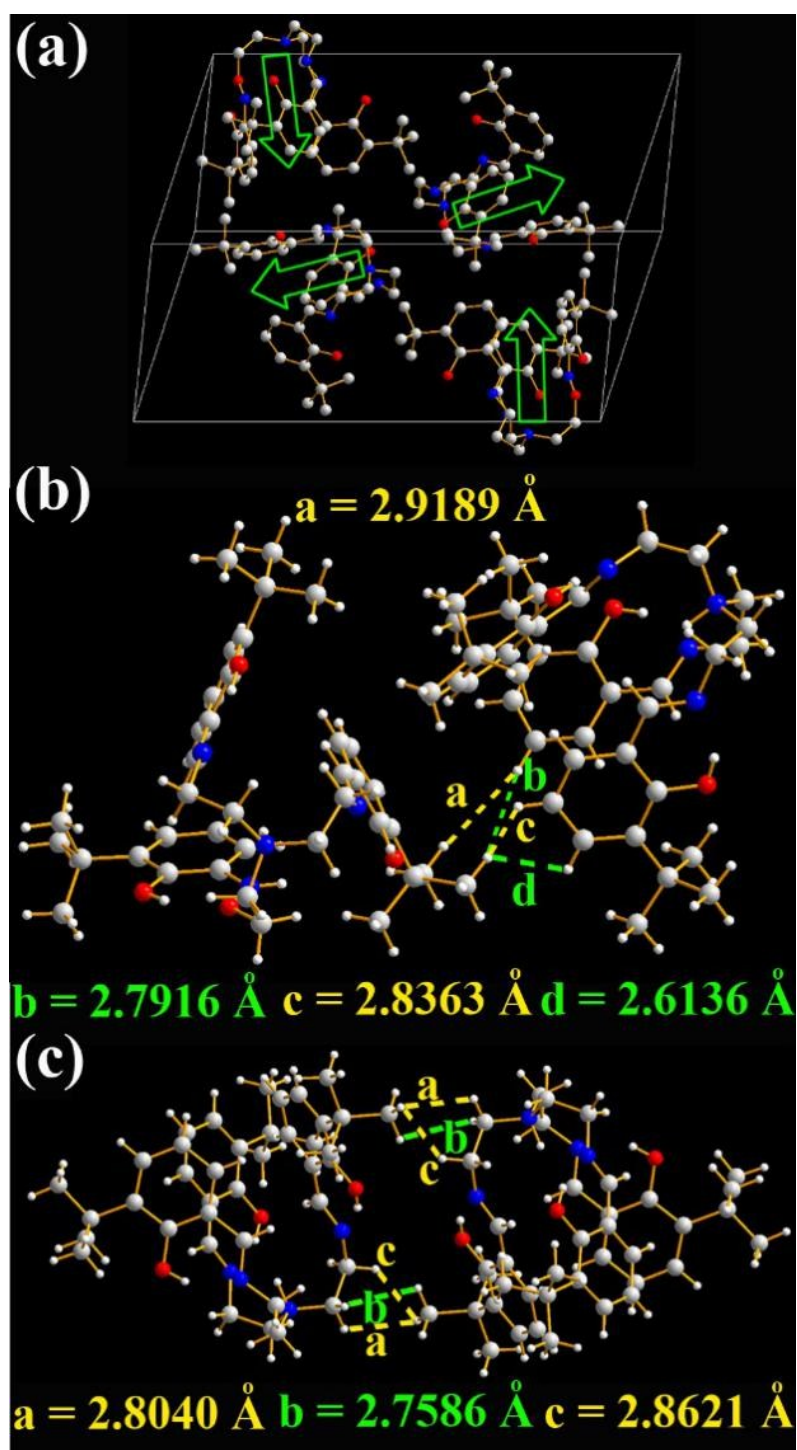

**Fig. S10** X-ray single crystal structures and packing of **3-*t*-Bu** molecules: (a) packing in a unit cell (H atoms are omitted and blue arrows indicate the opening direction of molecular cages); (b) and (c) intermolecular interactions of the two closest molecules.

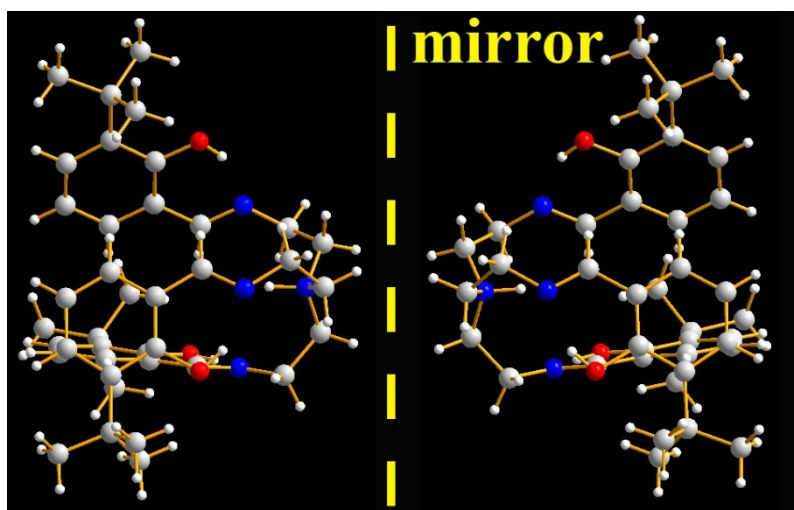

**Fig. S11** X-ray single crystal structures and packing of **3-*t*-Bu** enantiomers.

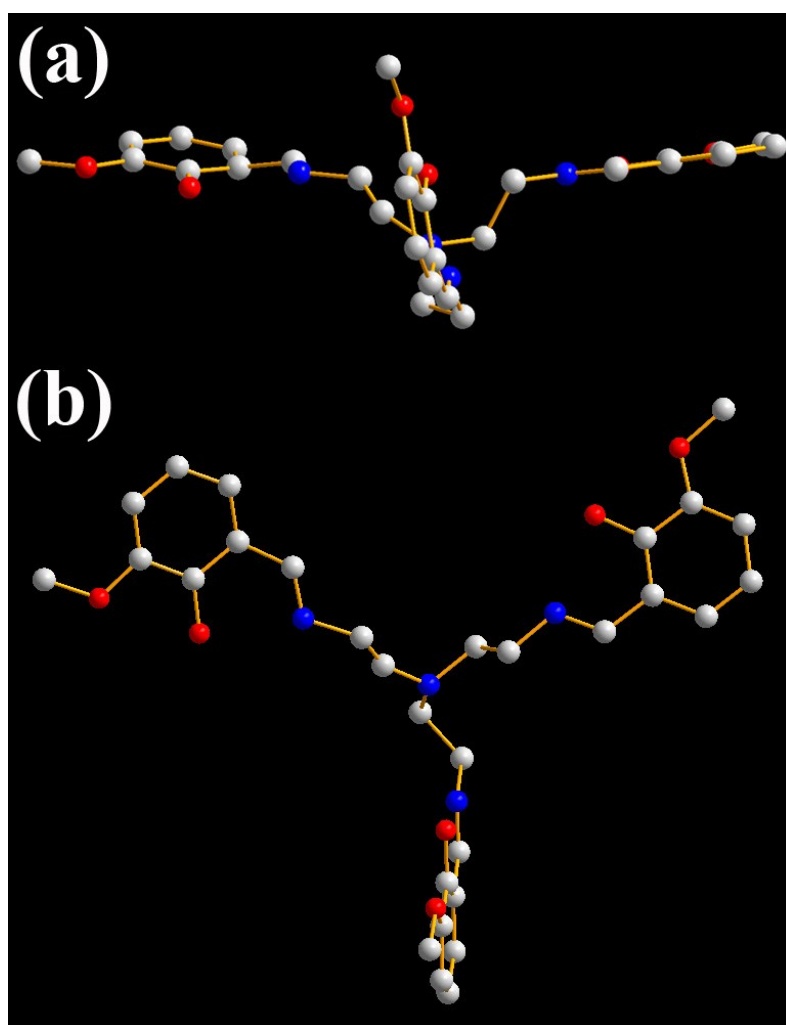

**Fig. S12** X-ray single crystal structure of **3-OMe** molecule: (a) side view; (b) top view.

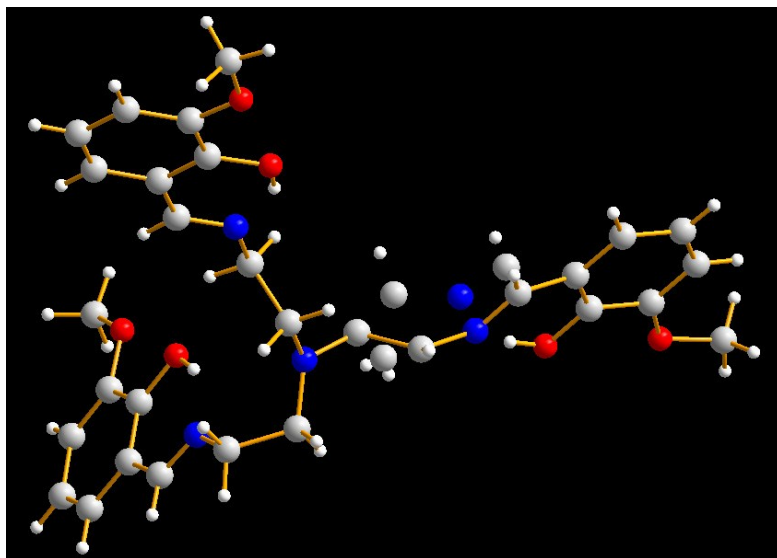

**Fig. S13** Dissoder of X-ray single crystal structure of **3-OMe** molecule.

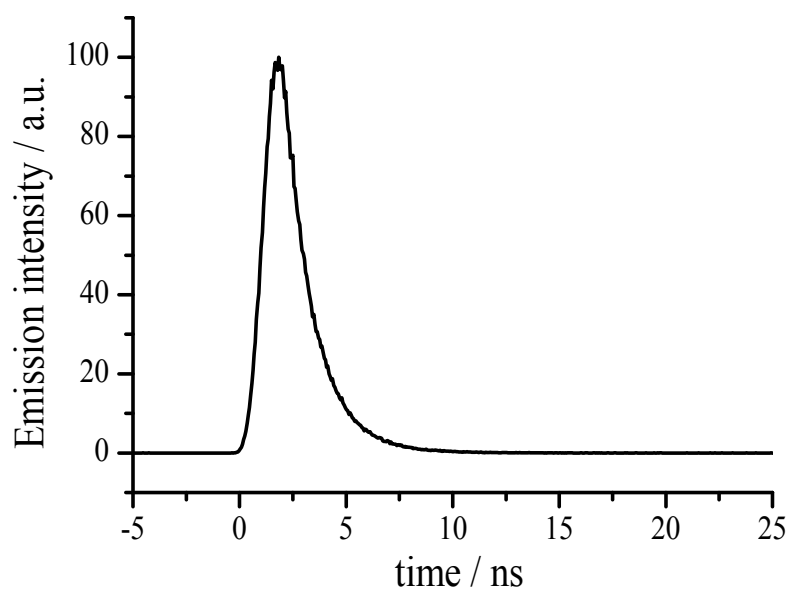

**Fig. S14** Time-resolved emission decay spectra (excited at 370 nm) of **3,5-Cl** powder samples.



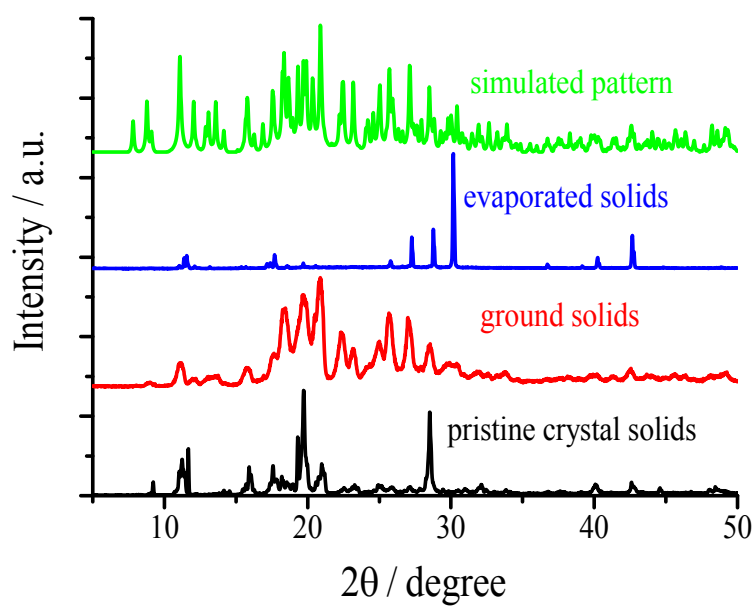

**Fig. S15** X-ray powder diffraction of **TSB** solids.

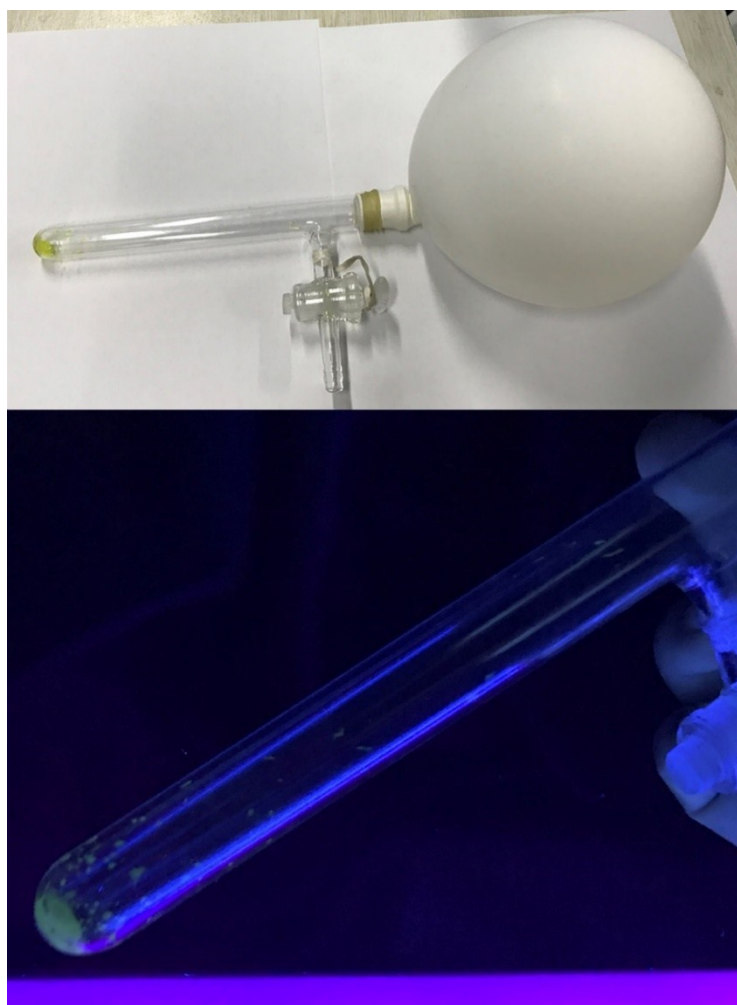

**Fig. S16** Amorphous samples of **TSB** prepared via the rapid cooling (ice-water bath) from the melted state ( $\sim 120$  °C in  $N_2$ ) under room light (top) and UV light (bottom).

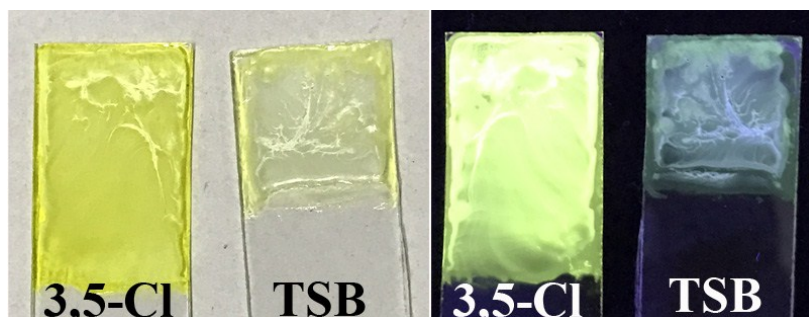

**Fig. S17** Casting films of **TSB** and **3,5-Cl** in PMMA (5.0 wt%) under room light (left) and UV light (right).

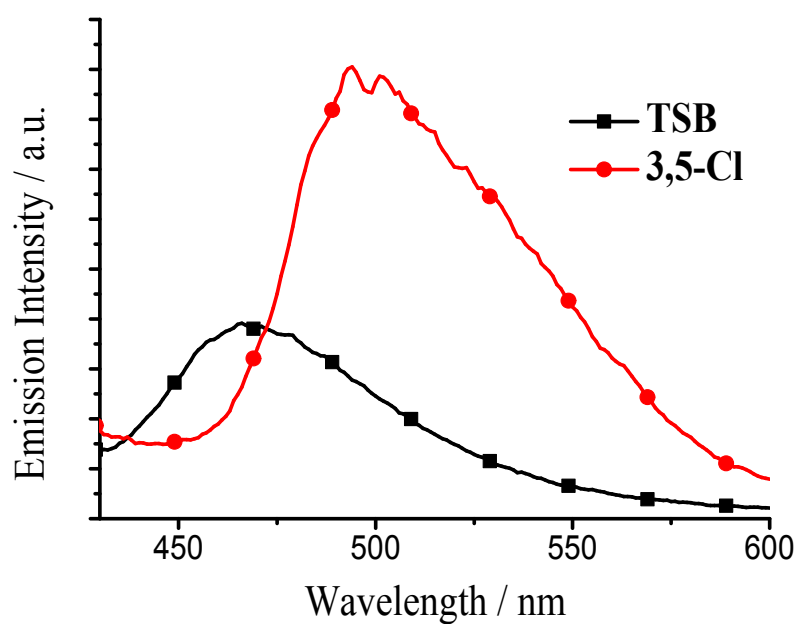

**Fig. S18** Emission spectra (excited at 370 nm) of **TSB** and **3,5-Cl** in THF at 77 K ( $3.0 \times 10^{-5}$  mol dm<sup>-3</sup>).

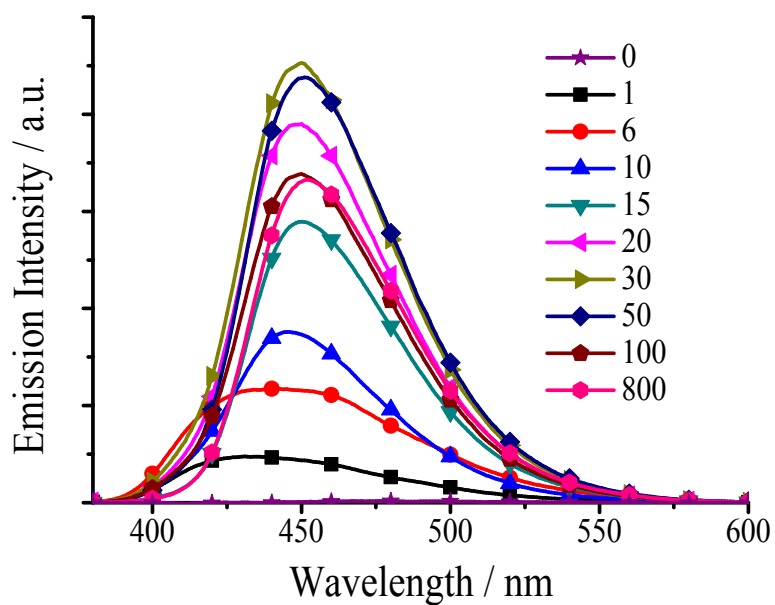

**Fig. S19** Emission spectra of **3-F** ( $1.0 \times 10^{-5}$  mol dm $^{-3}$  in DMSO, excited at 365 nm) upon the addition of different equivalents of OH $^{-}$ .

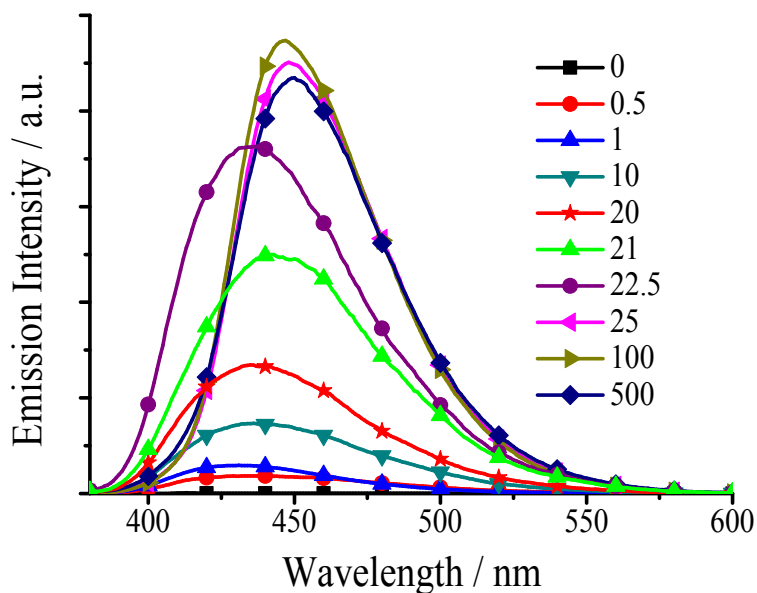

**Fig. S20** Emission spectra of **3-F** ( $1.0 \times 10^{-5}$  mol dm $^{-3}$  in DMSO, excited at 365 nm) upon the addition of different equivalents of F $^{-}$ .

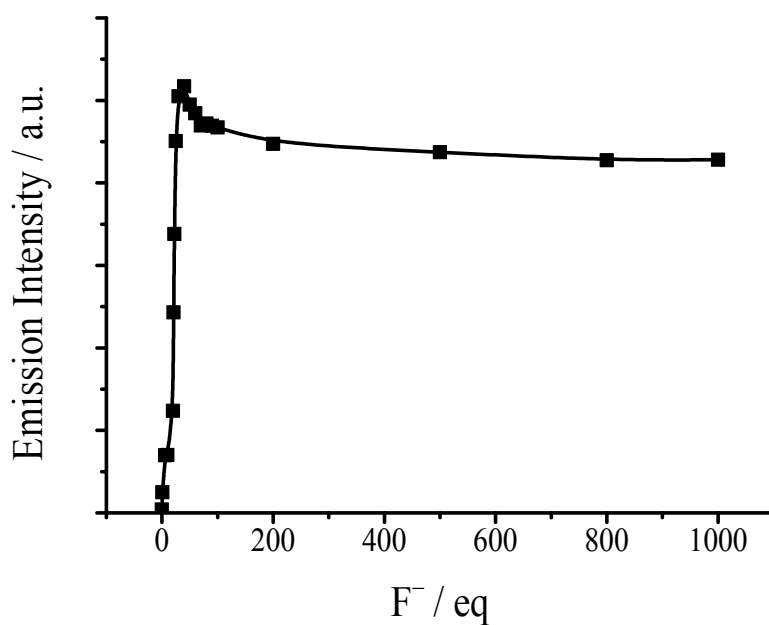

**Fig. S21** Plot of emission intensity of **3-F** ( $1.0 \times 10^{-5}$  mol dm $^{-3}$  in DMSO) at 450 nm (excited at 365 nm) as a function of F $^{-}$  concentration.

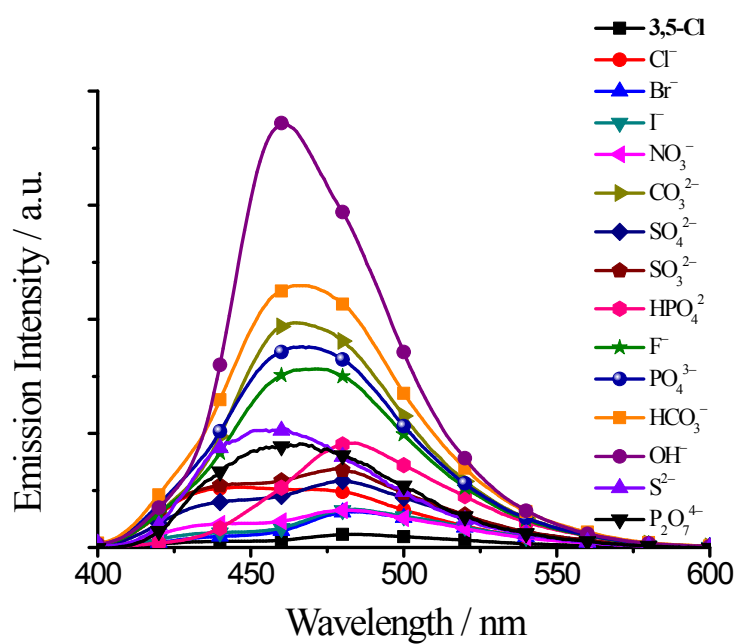

**Fig. S22** Emission spectra of **3,5-Cl** ( $1.0 \times 10^{-5}$  mol dm $^{-3}$  in DMSO, excited at 365 nm) upon the addition of 100 equivalent of different anions.

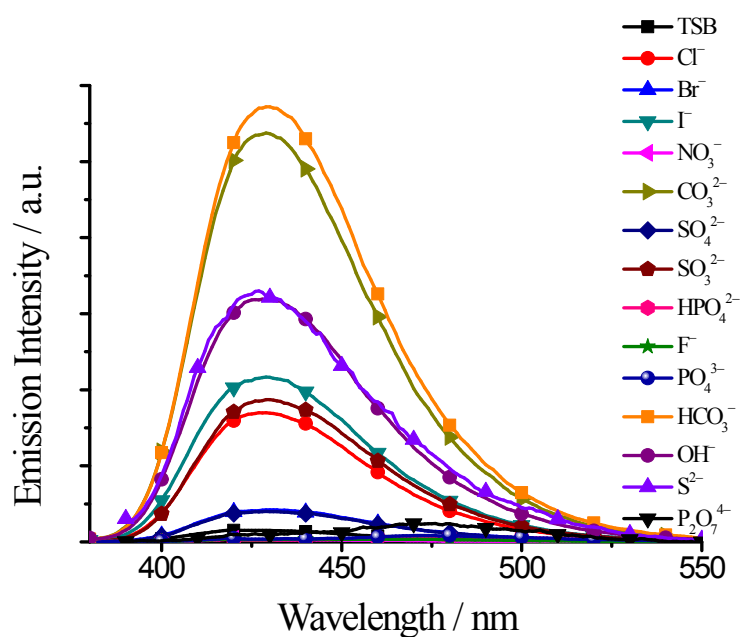

**Fig. S23** Emission spectra of **TSB** ( $1.0 \times 10^{-5}$  mol dm $^{-3}$  in DMSO, excited at 370 nm) upon the addition of 100 equivalent of different anions.

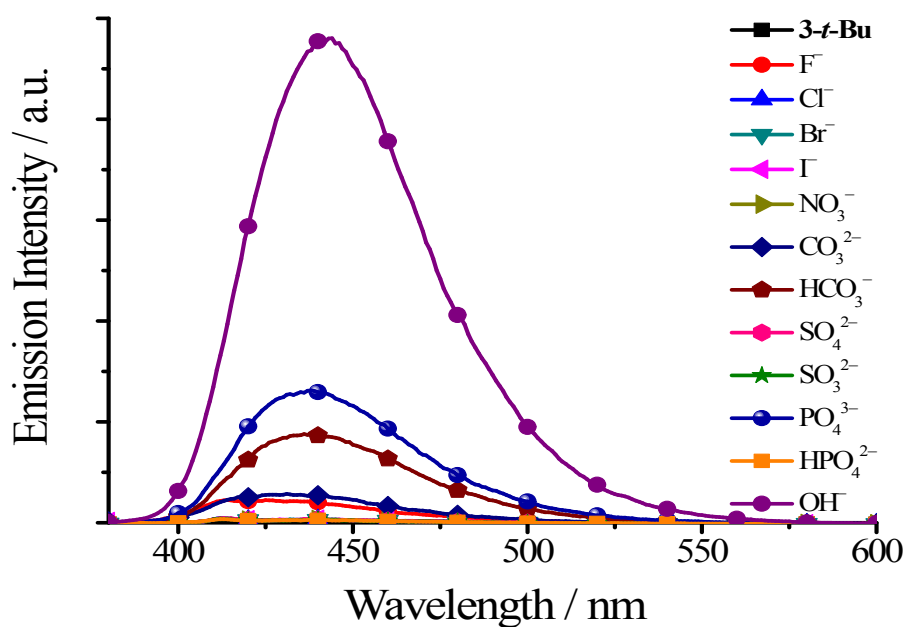

**Fig. S24** Emission spectra of **3-*t*-Bu** ( $1.0 \times 10^{-5}$  mol dm $^{-3}$  in DMSO, excited at 370 nm) upon the addition of 100 equivalent of different anions.

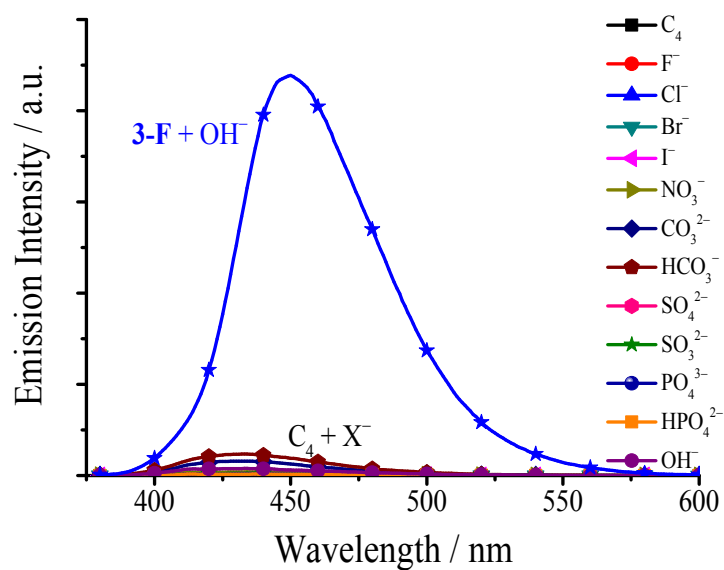

**Fig. S25** Emission spectra of  $C_4$  ( $1.0 \times 10^{-5}$  mol  $dm^{-3}$  in DMSO, excited at 365 nm) upon the addition of 100 equivalent of different anions and emission spectrum of **3-F** ( $1.0 \times 10^{-5}$  mol  $dm^{-3}$  in DMSO, excited at 365 nm) upon the addition of 100 equivalent of  $OH^-$ .

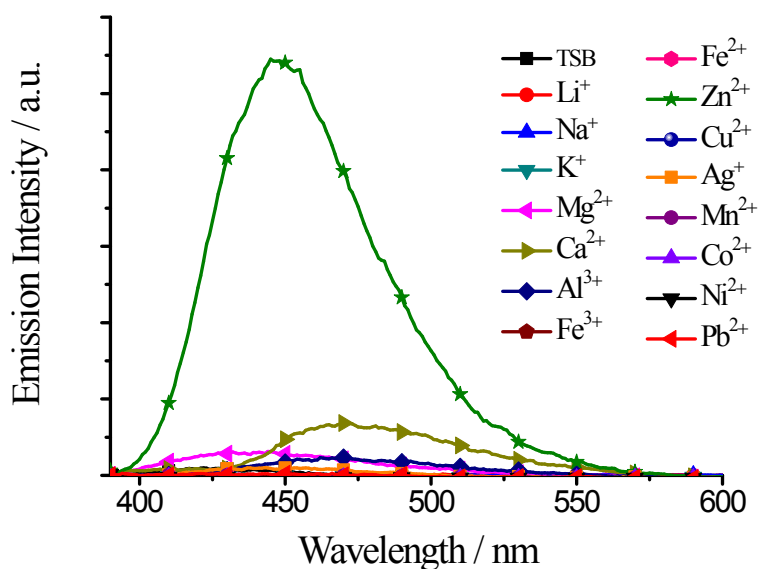

**Fig. S26** Emission spectra of **TSB** ( $1.0 \times 10^{-5}$  mol  $dm^{-3}$  in MeCN, excited at 370 nm) upon the addition of 5 equivalent of different metal ions.

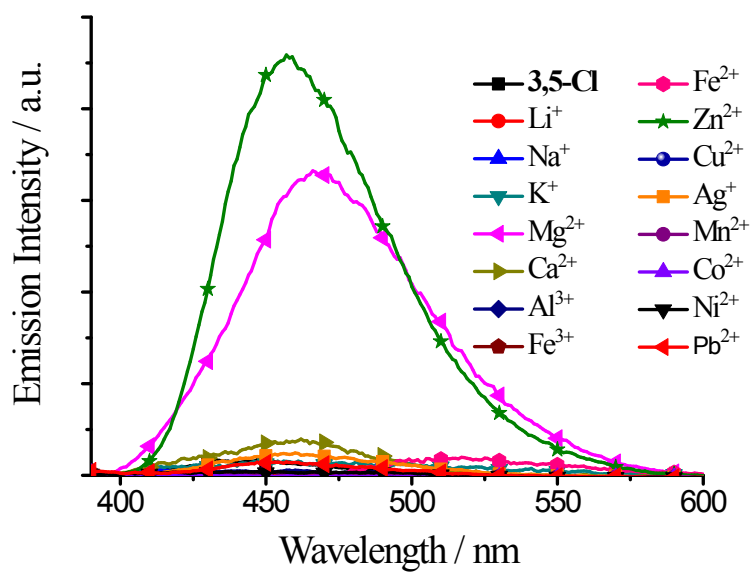

**Fig. S27** Emission spectra of **3,5-Cl** ( $1.0 \times 10^{-5}$  mol dm $^{-3}$  in MeCN, excited at 370 nm) upon the addition of 5 equivalent of different metal ions.

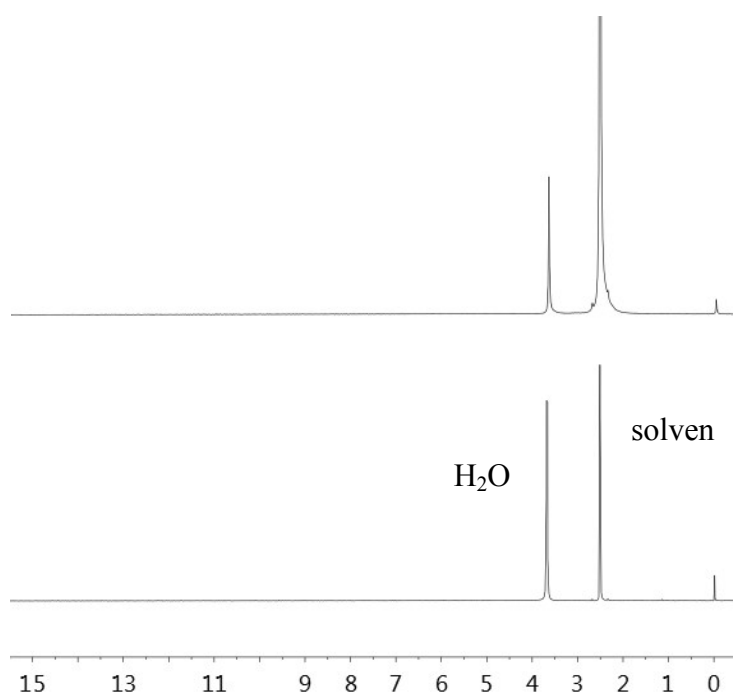

**Fig. S28**  $^1\text{H}$  NMR spectra of  $\text{OH}^-$  (top) and  $\text{F}^-$  (bottom) in  $\text{DMSO-d}_6$ .

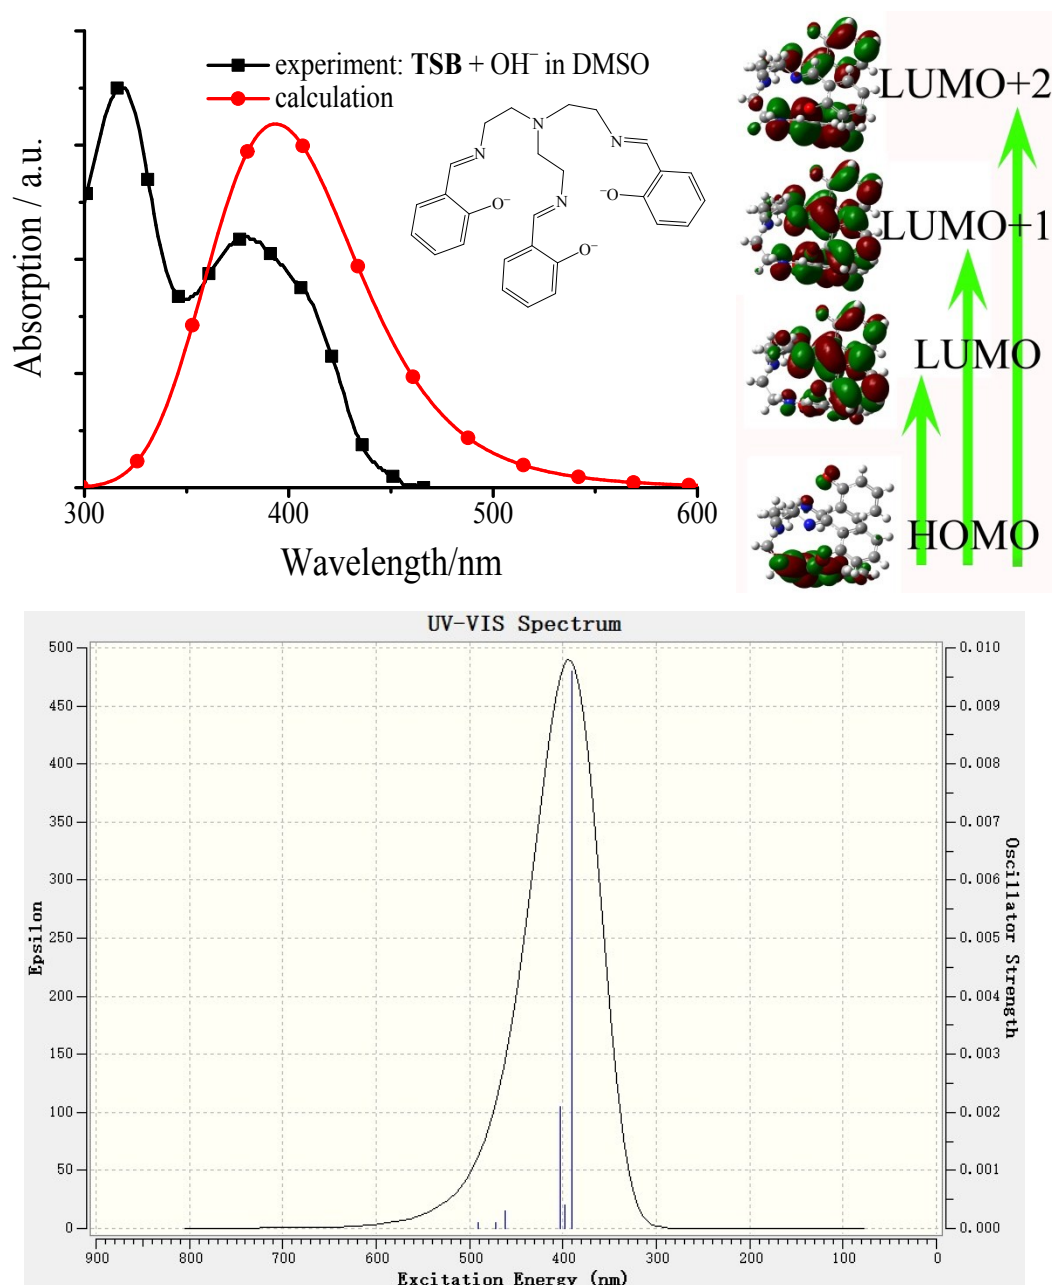

**Fig. S29** Top: computational (gas-phase) and experimental (in DMSO + 100 equivalent of OH<sup>-</sup>) absorption spectra, energy level diagram, and frontier molecular orbitals of **TSB** (in form of O<sup>-</sup>). Bottom: computational (gas-phase) absorption spectra of **TSB** (in form of O<sup>-</sup>).



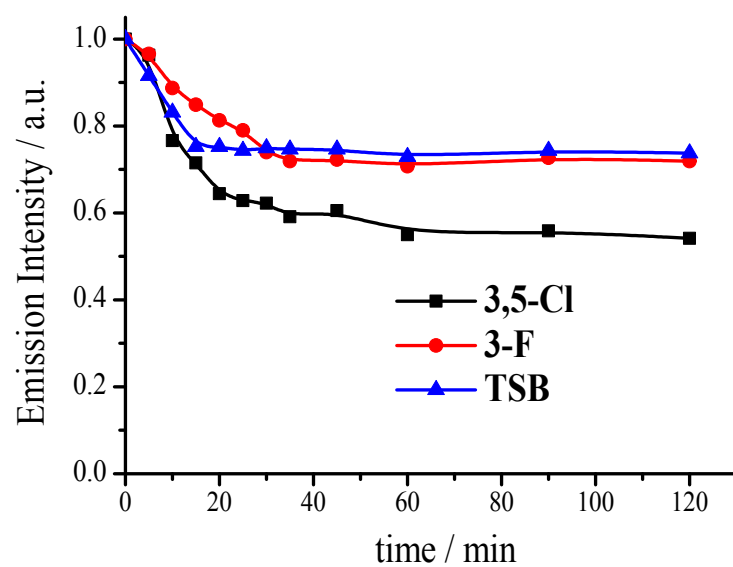

**Fig. S30** Fluorescence (excited at 380 nm) intensity decay curve of several **TSBs** solids under 360 nm UV light (30 W) irradiation.
